# Supplementary material
Source: PubMed Central journal article supplement (PMC5632815)
Supplement: NIHMS908996-supplement-Supporting_Information.pdf [file NIHMS908996-supplement-Supporting_Information.pdf]

## SUPPORTING INFORMATION

### **A Screen for Protein-Protein Interactions in Live Mycobacteria Reveals a Functional Link Between the Virulence-Associated Lipid Transporter LprG and the Mycolyltransferase Antigen 85A**

Megan H. Touchette, Erik R. Van Vlack, Lu Bai, Jia Kim, Armand B. Coggnetta III, Mary L. Previti, Keriann M. Backus, Dwight W. Martin, Benjamin F. Cravatt, Jessica C. Seeliger

| <b>Contents</b>                                                                                                                                                | <b>Page</b> |
|----------------------------------------------------------------------------------------------------------------------------------------------------------------|-------------|
| Supporting Materials and Methods                                                                                                                               |             |
| GFP fluorescence measurements                                                                                                                                  | S2          |
| Cloning                                                                                                                                                        | S2 – S3     |
| Supporting References                                                                                                                                          | S4 – S5     |
| Supporting Results                                                                                                                                             |             |
| Figure S1. Validation of site-specific incorporation of the photocrosslinking unnatural amino acid pBpa into GFP47TAG via nonsense suppression in <i>Msm</i> . | S6          |
| Figure S2. The growth attenuation of $\Delta lprG$ is complemented.                                                                                            | S7          |
| Figure S3. <i>ag85A::Tn</i> accumulates TMM without loss of TDM independent of the growth medium.                                                              | S8          |
| Table S1. LprG-6xHis expression constructs and oligonucleotide primers.                                                                                        | S9          |
| Table S2. Unnatural amino acid incorporation expression constructs and oligonucleotide primers.                                                                | S9 – S11    |
| Table S3. Unnatural amino acid incorporation expression constructs and oligonucleotide primers used to confirm MS-identified LprG-interactor proteins.         | S11         |
| Table S4. Constructs and oligonucleotide primers used for the production of the $\Delta lprG$ and $\Delta lprG:lprG$                                           | S11         |
| Table S5. LprG(98pBpa) proteomic data                                                                                                                          | Excel file  |

## SI Materials and Methods

**GFP fluorescence measurements.** A 10-mL culture of *Msm* transformed with pSMT-pHsp60-MjtRNA-3xFLAG and pMV361-pHsp60-MjTyrRS was grown in 7H9 for 9 hours at 37 °C at 225 rpm to an OD<sub>600</sub> ~0.2. Filter-sterilized 100 mM pBpa in 1:5 1 N NaOH:water was added to the cells to a final concentration of 2 mM pBpa and incubated at 37 °C with shaking at 225 rpm in the dark for another 15 hours. Control cells were treated with an equivalent volume of 1:5 1 N NaOH:MQ water. Cells were harvested at 4,000 rpm and resuspended in PBS with 0.05% Tween80 to OD<sub>600</sub> 1.0 and 150 µL were aliquoted in a 96-well plate (Corning). Fluorescence was measured using a Synergy 2 plate reader (BioTek) with an emission filter at 485 nm and an excitation filter at 538 nm.

**Cloning.** All LprG-6xHis constructs were generated by InFusion (Clontech) between vector digested with the specified enzymes and a gel-purified PCR product generated by the primers in Table S5. *Msm lprG* was first cloned into the *E. coli* vector pET24b (Novagen) to append a 6xHis tag and simultaneously insert a TEV protease cleavage site (ENLYFQS). The *lprG*-6xHis fusions were then subcloned into the mycobacterial shuttle plasmid pMV261 to generate the final expression constructs.

The pSMT-MsmLprG-3xFLAG-MjtRNA plasmid and its variants were developed from pSMT-MjtRNA-GFP(151TAG) (gift of Peter Schultz, Scripps Research Institute, La Jolla, California). DNA sequencing revealed that the TAG codon was located at amino acid 47, not 151; the plasmid was accordingly renamed pSMT-MjtRNA-GFP(47TAG). The *gfp* sequence was excised using restriction enzymes NdeI and XbaI, the 3xFLAG tag was amplified from pET24b pMop-3xFLAG using primers listed on Table S1 and subcloned into the pSMT vector via InFusion (Clontech) to create pSMT-3xFLAG-MjtRNA. The NdeI site was not reconstituted in the vector in order to maintain the unique nature of a second NdeI site in the insert. The gene for *lprG* (MSMEG\_3070) was amplified from *Msm* mc<sup>2</sup>155 genomic DNA using the primers listed on

Table S1 and subcloned into pSMT-3xFLAG-MjtRNA via In-Fusion (Clontech). The pMV361\_MjTyrRS plasmid was constructed largely as described. MjTyrRS was amplified from the pEVOL-pBpF plasmid (Addgene, cat# 31190) and subcloned into pMV361 via In-Fusion (Clontech) using the primers listed on Table S1.

The pBpa and YH mutants were created by site-directed mutagenesis of *lprG* in pET24b-MsmLprG-TEV-6xHis or pMV261-MsmLprG-TEV-6xHis using the primers listed on Table S2. Mutated *lprG* was amplified and subcloned into pSMT-3xFLAG-MjtRNA using either In-Fusion or traditional ligation.

The constructs used to confirm crosslinking of LprG(98pBpa) with MS-identified interacting proteins were generated by amplifying the target gene from *Msm mc<sup>2</sup>155* genomic DNA using the primers listed in Table S3. The PCR products were subcloned into pSMT-MsmLprG(98pBpa)-3xFLAG-MjtRNA-6xHis by In-Fusion. For the additional LprG(pBpa) mutants LprG(136pBpa) and LprG(232pBpa), the corresponding alleles were excised from the appropriate pSMT-MsmLprG-3xFLAG-MjtRNA vector using NdeI and NheI. The pSMT-MsmLprG-Q98pBpa-3xFLAG-MjtRNA-(interactor)-6xHis (where “interactor” is *lprG*, *lppi*, or *lppk*) constructs were also digested with NdeI and NheI to remove *lprG*-Q98pBpa, and the *lprG*-A136pBpa or *lprG*-T232pBpa inserts were subcloned into this vector via traditional ligation to provide site-specific interaction controls. Sequence confirmed plasmids were electroporated into *Msm*::pMV361\_MjTyrRS.

The *Msm ΔlprG* strain was generated as reported (1). Briefly, regions from the 5' and 3' ends of *lprG* were amplified from *Msm mc<sup>2</sup>155* genomic DNA using the primers listed in Table S3 and inserted on either side of the hygromycin resistance cassette in pJSC407 (2) by In-Fusion. The recombineering substrate was amplified using the 5' flank forward primer and the 3' flank reverse primer and 1 μg of the gel-purified product was transformed into *Msm*. Clones were recovered on selective medium and verified for recombination by PCR. The complement plasmid pMV306-*lprG* was generated using the primers in Table S3. Briefly, *lprG* and a 1kb

segment of the region upstream of the start codon (as a native promoter) was amplified and inserted into pMV306 (3) by In-Fusion. The sequence-verified plasmid was transformed into  $\Delta lprG$  to generate the strain  $\Delta lprG::lprG$  containing a single chromosomally integrated copy of *lprG* under control of a native promoter.

## References

1. Murphy, K. C.; Papavinasasundaram, K.; Sasseti, C. M., Mycobacterial recombineering. *Methods in Molecular Biology* **2015**, 1285, 177-99.
2. Stanley, S. A.; Raghavan, S.; Hwang, W. W.; Cox, J. S., Acute infection and macrophage subversion by *Mycobacterium tuberculosis* require a specialized secretion system. *Proc Natl Acad Sci U S A* **2003**, 100 (22), 13001-6.
3. Stover, C. K.; de la Cruz, V. F.; Fuerst, T. R.; Burlein, J. E.; Benson, L. A.; Bennett, L. T.; Bansal, G. P.; Young, J. F.; Lee, M. H.; Hatfull, G. F.; et al., New use of BCG for recombinant vaccines. *Nature* **1991**, 351 (6326), 456-60.
4. Bigi, F.; Gioffre, A.; Klepp, L.; Santangelo, M. P.; Alito, A.; Caimi, K.; Meikle, V.; Zumarraga, M.; Taboga, O.; Romano, M. I.; Cataldi, A., The knockout of the *lprG-Rv1410* operon produces strong attenuation of *Mycobacterium tuberculosis*. *Microbes Infect* **2004**, 6 (2), 182-7.
5. Gaur, R. L.; Ren, K.; Blumenthal, A.; Bhamidi, S.; Gibbs, S.; Jackson, M.; Zare, R. N.; Ehrh, S.; Ernst, J. D.; Banaei, N., LprG-Mediated Surface Expression of Lipoarabinomannan Is Essential for Virulence of *Mycobacterium tuberculosis*. *PLoS Pathog.* **2014**, 10 (9), e1004376.
6. Farrow, M. F.; Rubin, E. J., Function of a mycobacterial major facilitator superfamily pump requires a membrane-associated lipoprotein. *J. Bacteriol.* **2008**, 190 (5), 1783-91.

7. Martinot, A. J.; Farrow, M.; Bai, L.; Layre, E.; Cheng, T. Y.; Tsai, J. H.; Iqbal, J.; Annand, J. W.; Sullivan, Z. A.; Hussain, M. M.; Sacchettini, J.; Moody, D. B.; Seeliger, J. C.; Rubin, E. J., Mycobacterial Metabolic Syndrome: LprG and Rv1410 Regulate Triacylglyceride Levels, Growth Rate and Virulence in *Mycobacterium tuberculosis*. *PLoS Pathog.* **2016**, 12 (1), e1005351.

## SI Results

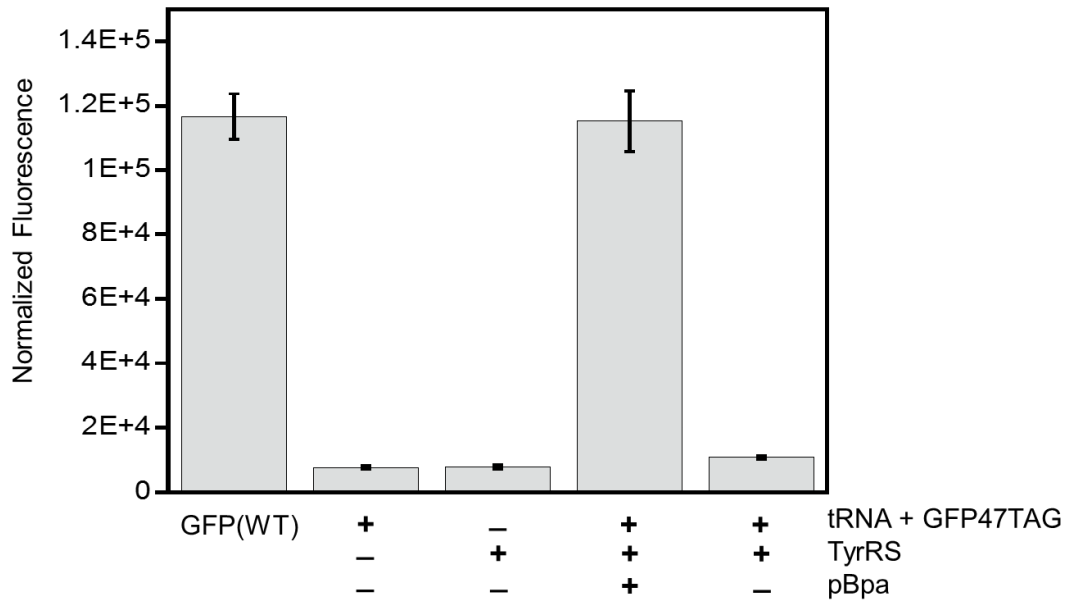

**Figure S1. Validation of site-specific incorporation of the photocrosslinking unnatural amino acid pBpa into GFP47TAG via nonsense suppression in *Msm*.** *Msm* expressing different components of the nonsense suppression machinery and either GFP(WT) or the mutant GFP47TAG were grown with or without 2 mM pBpa for 15 h. GFP fluorescence was measured in whole cells as a readout for expression of full-length GFP.

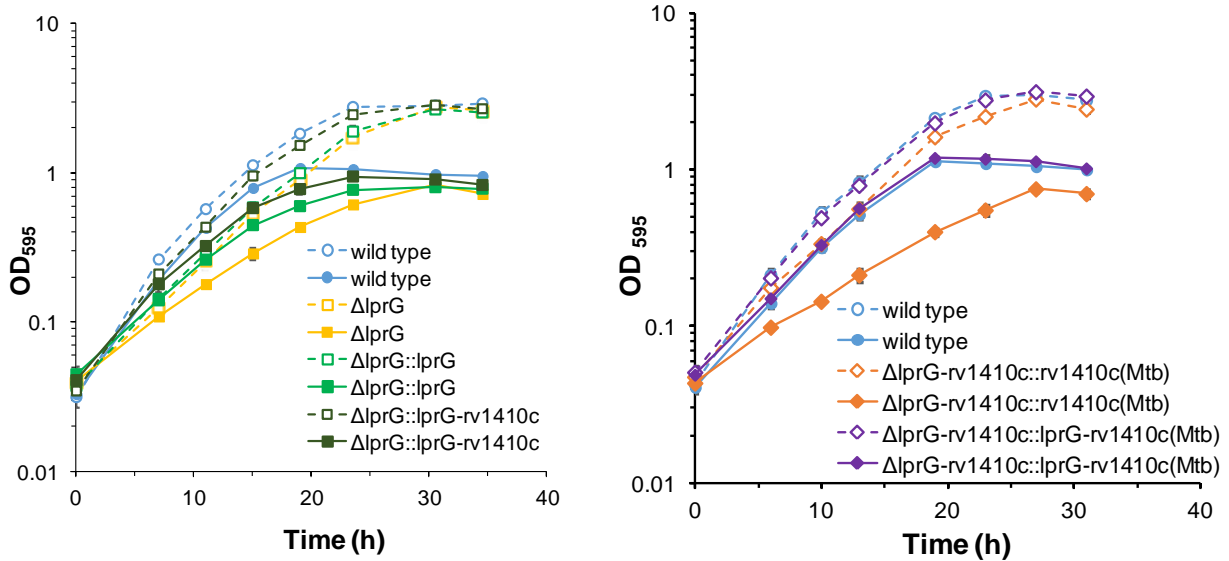

**Figure S2. The growth attenuation of  $\Delta lprG$  is complemented.** (*left*) The introduction of a single copy of *lprG* in the  $\Delta lprG$  deletion mutant partially restores growth on modified Sauton with either glycerol (dashed lines) or propionate (solid lines) as the primary carbon source. Complementation with both *lprG* and the downstream gene *rv1410c* further restores growth, suggesting that deletion of *lprG* compromises the expression of *rv1410c*, as has been noted previously (4, 5). (*right*) In contrast, *Msm*  $\Delta lprG$ -*rv1410c* (6) complemented with *Mtb* *rv1410c* shows a similar growth defect that is restored upon the addition of *Mtb* *lprG* (7). These additional data show that the observed growth attenuation is not due to loss of function in the downstream gene *rv1410c*.

|         |      |      |      |      |
|---------|------|------|------|------|
| %TDM    | 6    | 9    | 6    | 8    |
| %TMM    | 5    | 17   | 5    | 5    |
| TMM/TDM | 0.87 | 1.93 | 0.86 | 0.62 |

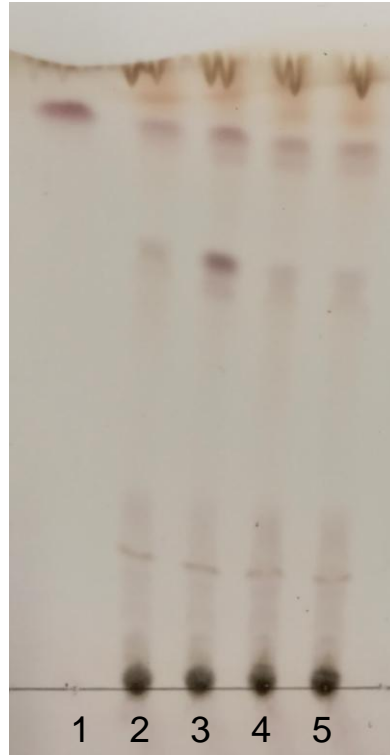

**Figure S3. *ag85A::Tn* accumulates TMM without loss of TDM independent of the growth medium.** TDM/TMM analysis was performed as in Figure 7C except the growth medium was 7H9 (see Methods). The calculated TDM and TMM levels (as a percent of total lipid) differed between experiments due to experimental variation in TLC resolution (especially for TDM). However, the relative lipid levels between strains were consistent, *i.e.*, with an elevated TMM level and TMM/TDM ratio for *ag85A::Tn*.



**Table S1.** LprG-6xHis expression constructs and oligonucleotide primers.

| Vector Construct (Gene)                 | Forward primer (5' to 3')                        | Reverse primer (5' to 3')                               | Template                                |
|-----------------------------------------|--------------------------------------------------|---------------------------------------------------------|-----------------------------------------|
| pET24b_MsmLprG-TEV-6xHis_(MSMEG_3070)   | AAGAAGGAGATATACATATGCAGACGCGCCACGC               | GTGCGGCCGCAAGCTTGGATTGGAAGTACAGGTTT<br>TCGGCCGCGGGCTTGG | Msm gDNA                                |
| pET24b_NA-MsmLprGTEV-6xHis_(MSMEG_3070) | AAGAAGGAGATATACATATGTCGTCGTCATCGGAGACCTCC        | GTGCGGCCGCAAGCTTGGATTGGAAGTACAGGTTT<br>TCGGCCGCGGGCTTGG | Msm gDNA                                |
| pMV261_MsmLprG-TEV-6xHis_(MSMEG_3070)   | GGAATCACTTCGCAATGGCCAGCCAGACGCGCCCA<br>CGC       | ACATCGATAAGCTTCGAAATTCCTTTGTTAGCAGCCG<br>GATCTCAGTG     | pET24b_MsmLprG-TEV-6xHis_(MSMEG_3070)   |
| pMV261_NA-MsmLprGTEV-6xHis_(MSMEG_3070) | GGAATCACTTCGCAATGGCCAGCTCGTCGTCATCG<br>GAGACCTCC | ACATCGATAAGCTTCGAAATTCCTTTGTTAGCAGCCG<br>GATCTCAGTG     | pET24b_NA-MsmLprGTEV-6xHis_(MSMEG_3070) |

\* Restriction sites: NdeI, **HindIII**, **MscI**, **EcoRI**. In 3' primer: TEV cleavage site

**Table S2.** Unnatural amino acid incorporation expression constructs and oligonucleotide primers.

| Mutation | Description                                | Forward primer (5' to 3')       | Reverse primer (5' to 3')         | Template                                   |
|----------|--------------------------------------------|---------------------------------|-----------------------------------|--------------------------------------------|
| Y132pBpa | pSMT-pHsp60-MsmLprG-Y132pBpa-3xFLAG-MjtRNA | ggccaacatctaggacgtgtcgccgatcctg | cgcacacgtcctagatgtggccgcgccacc    | pET24b-MsmLprG-TEV-6xHis                   |
| L70 pBpa | pSMT-pHsp60-MsmLprG-L70pBpa-3xFLAG-MjtRNA  | ggtcgacggtagcccgtaggagaagctcgac | ctccacgggctaccgctcgaccttgcctg     | pET24b-MsmLprG-TEV-6xHis                   |
| F96pBpa  | pSMT-pHsp60-MsmLprG-F96pBpa-3xFLAG-MjtRNA  | cctgatcgctagggccagaagatcgccgac  | cttctggccctacgcatcaggtcgccggtg    | pMV261-pHsp60-MsmLprG-TEV-6xHis-MscI+EcoRI |
| Q98pBpa  | pSMT-pHsp60-MsmLprG-Q98pBpa-3xFLAG-MjtRNA  | cgcgctcgctagaagatcgccgacgcaag   | cggcgatcttctagccgaacgcatcaggtc    | pMV261-pHsp60-MsmLprG-TEV-6xHis-MscI+EcoRI |
| D102pBpa | pSMT-pHsp60-MsmLprG-D102pBpa-3xFLAG-MjtRNA | gaagatcgctaggcgaagtctgatcgccg   | cgaactcgcttaggcatcttctggccgaac    | pMV261-pHsp60-MsmLprG-TEV-6xHis-MscI+EcoRI |
| L37pBpa  | pSMT-pHsp60-MsmLprG-L37pBpa-3xFLAG-MjtRNA  | ccgacgcaccgtagcccagcgggtgccgctg | caccgtcgggctacgggtcgctggaggctcctg | pET24b-MsmLprG-TEV-6xHis                   |
| N130pBpa | pSMT-pHsp60-MsmLprG-N130pBpa-3xFLAG-MjtRNA | gtgccgcgccctagatctacgacgtgtcgcg | cgctgtagatctaggccgcccaccgtagttc   | pMV261-pHsp60-MsmLprG-TEV-6xHis-MscI+EcoRI |
| K187pBpa | pSMT-pHsp60-MsmLprG-K187pBpa-3xFLAG-MjtRNA | caccggcgctctaggccgacgcccgggtgcc | ggccgtcggcctagagcggcgggtgcatctg   | pET24b-MsmLprG-TEV-6xHis                   |
| K181pBpa | pSMT-pHsp60-MsmLprG-K181pBpa-3xFLAG-MjtRNA | cgcggtcaactagatcgaccggcgctcaag  | ccggtgcatctagttgaccgctcgccgctg    | pMV261-pHsp60-MsmLprG-TEV-6xHis-MscI+EcoRI |
| A149pBpa | pSMT-pHsp60-MsmLprG-A149pBpa-3xFLAG-MjtRNA | caactgtctagaacttctccgacgccacg   | cggagaagtctacagcaggtggccaggc      | pET24b-MsmLprG-TEV-6xHis                   |

|          |                                            |                                            |                                            |                                            |
|----------|--------------------------------------------|--------------------------------------------|--------------------------------------------|--------------------------------------------|
| A136pBpa | pSMT-pHsp60-MsmLprG-A136pBpa-3xFLAG-MjtRNA | cgacgtgtcgtagatcctgaacccccgacacg           | ggttcaggatctacgacacgtcgtagatgttg           | pMV261-pHsp60-MsmLprG-TEV-6xHis-Mscl+EcoRI |
| E160pBpa | pSMT-pHsp60-MsmLprG-E160pBpa-3xFLAG-MjtRNA | cgacggccgctagtcgatcaacggcaccgag            | cgttgatcgactagcggccgtcgccgtggc             | pET24b-MsmLprG-TEV-6xHis                   |
| D109pBpa | pSMT-pHsp60-MsmLprG-D109pBpa-3xFLAG-MjtRNA | cgtgatcgcctagggaatctctacgcggc              | gagattgccctaggcgatcacgaactcgc              | pMV261-pHsp60-MsmLprG-TEV-6xHis-Mscl+EcoRI |
| L60pBpa  | pSMT-pHsp60-MsmLprG-L60pBpa-3xFLAG-MjtRNA  | cgtgcacctgtagctgacgggtcagggcaag            | gcaccgtcagctacaggtgcacgctctgctgcg          | pET24b-MsmLprG-TEV-6xHis                   |
| L93pBpa  | pSMT-pHsp60-MsmLprG-L93pBpa-3xFLAG-MjtRNA  | caccgccgactagatcgcttcggccagaag             | cgaacgcgatctagtcggcggtgccctccgc            | pET24b-MsmLprG-TEV-6xHis                   |
| L75pBpa* | pSMT-pHsp60-MsmLprG-L75pBpa-3xFLAG-MjtRNA  | cgtggagaagtaggacggcgacctgaccaac            | ggtcgccgtcctactctccacgggcagcccg            | pET24b-MsmLprG-TEV-6xHis                   |
| V218pBpa | pSMT-pHsp60-MsmLprG-V218pBpa-3xFLAG-MjtRNA | gggcaacagctagacgatgacgctctcggac            | gcgtcatcgtctagctgttcccggcggtggc            | pET24b-MsmLprG-TEV-6xHis                   |
| K227pBpa | pSMT-pHsp60-MsmLprG-K227pBpa-3xFLAG-MjtRNA | gactggggttagcaggtcaacgtcaccaag             | cgttgacctgctaaccccagtcgagagcg              | pET24b-MsmLprG-TEV-6xHis                   |
| T232pBpa | pSMT-pHsp60-MsmLprG-T232pBpa-3xFLAG-MjtRNA | gaatcactcgcacatatgcagacgcgcccac            | cctttagtcgctagcggccgcgggcttc               | pET24b-MsmLprG-TEV-6xHis                   |
| A236pBpa | pSMT-pHsp60-MsmLprG-A236pBpa-3xFLAG-MjtRNA | gaatcactcgcacatatgcagacgcgcccac            | cctttagtcgctagcctacgcgggcttggg             | pET24b-MsmLprG-TEV-6xHis                   |
| V23pBpa  | pSMT-pHsp60-MsmLprG-V23pBpa-3xFLAG-MjtRNA  | gcgctgtaggccgggtgtcgtcgtcatcggagacctccgacg | cccggcctacagcgcagcagcgggtggcaaggatgg       | pET24b-MsmLprG-TEV-6xHis                   |
| S29pBpa  | pSMT-pHsp60-MsmLprG-S29pBpa-3xFLAG-MjtRNA  | tcgtcgtagtcggagacctccgacgcaccgctccgacg     | ctccgactacgacgaacaccccggcgaccagcg          | pET24b-MsmLprG-TEV-6xHis                   |
| E31pBpa  | pSMT-pHsp60-MsmLprG-E31pBpa-3xFLAG-MjtRNA  | tcatcgtagacctccgacgcaccgctcccgacggtgccg    | ggaggtctacgatgacgacgaacaccccggcgaccagcg    | pET24b-MsmLprG-TEV-6xHis                   |
| T32pBpa  | pSMT-pHsp60-MsmLprG-T32pBpa-3xFLAG-MjtRNA  | catcggagtagtccgacgcaccgctcccgacggtgcc      | gtcggactactccgatgacgacgaacaccccggcgaccagcg | pET24b-MsmLprG-TEV-6xHis                   |
| D34pBpa  | pSMT-pHsp60-MsmLprG-D34pBpa-3xFLAG-MjtRNA  | acctcctaggcaccgctcccgacggtgccg             | cggtgcctaggaggtctccgatgacgacgaacaccccggc   | pET24b-MsmLprG-TEV-6xHis                   |
| Y115H    | pSMT-pHsp60-MsmLprG-Y115H-3xFLAG-MjtRNA    | cggcaatctccacgcggcgctgacgcccggcg           | cagcgccgctggagattgccgtcggcgatcac           | pET24b-MsmLprG-TEV-6xHis                   |
| Y125H    | pSMT-pHsp60-MsmLprG-Y127H-3xFLAG-MjtRNA    | gctgtcgaaccacggtgccgcccgaacatc             | gccgcggcaccggtggtcgacagcgggatcggc          | pET24b-MsmLprG-TEV-6xHis                   |

|                                 |                                                     |                                |                                  |                                               |
|---------------------------------|-----------------------------------------------------|--------------------------------|----------------------------------|-----------------------------------------------|
| Y132H                           | pSMT-pHsp60-MsmLprG-Y132H-3xFLAG-MjtRNA             | gccaacatccacgacgtgtcgcgatcctg  | gacacgtctggatgtggccgcggcacc      | pET24b-MsmLprG-TEV-6xHis                      |
| Y2xH<br>(Y115H + Y125H)         | pSMT-pHsp60-MsmLprG-Y115H-Y127H-3xFLAG-MjtRNA       | gctgtcgaaccacggtgcccgcccaacatc | gcccgccaccgtggttcgacagcggatcgccg | pSMT-pHsp60-MsmLprG-Y115H-3xFLAG-MjtRNA       |
| Y3xH<br>(Y115H + Y125H + Y132H) | pSMT-pHsp60-MsmLprG-Y115H-Y125H-Y132H-3xFLAG-MjtRNA | gccaacatccacgacgtgtcgcgatcctg  | gacacgtctggatgtggccgcggcacc      | pSMT-pHsp60-MsmLprG-Y115H-Y125H-3xFLAG-MjtRNA |

\*Traditional ligation

**Table S3.** Unnatural amino acid incorporation expression constructs and oligonucleotide primers used to confirm MS-identified LprG-interactor proteins.

| Interactor   | Description                                                | Forward primer (5' to 3')            | Reverse primer (5' to 3')          |
|--------------|------------------------------------------------------------|--------------------------------------|------------------------------------|
| <b>LprG</b>  | pSMT-pHsp60-MsmLprG-Q98pBpa-3xFLAG-hsp60-lprG-6xHis-MjtRNA | tcacttcgcaacgcgtgcagacgcgccac        | ggtgatggtgggatccggccgaggcttggtg    |
| <b>Lppi</b>  | pSMT-pHsp60-MsmLprG-Q98pBpa-3xFLAG-hsp60-lppi-6xHis-MjtRNA | tcacttcgcaacgcgtgcggactgctgtgatcctc  | ggtgatggtgggatccatccggttcgacgtgaac |
| <b>LppK</b>  | pSMT-pHsp60-MsmLprG-Q98pBpa-3xFLAG-hsp60-lppK-6xHis-MjtRNA | tcacttcgcaacgcgtgaaccggaaccgaatcgag  | ggtgatggtgggatccgactgcccgccaccgg   |
| <b>Ag85A</b> | pSMT-Hsp60-LprG- Q98ΔTAG-Flag, Hsp60-ag85A-6xHis-MjtRNA    | tcacttcgcaacgcgtgaagttcgtgggagaatgcg | tggtgatggtgggatccggcggtcggggtcgc   |

**Table S4.** Constructs and oligonucleotide primers used for the production of the  $\Delta lprG$  and  $\Delta lprG:lprG$

| Construct                                                | Description            | Note                                       | Forward primer (5' to 3')            | Reverse primer (5' to 3')              | Template                                   |
|----------------------------------------------------------|------------------------|--------------------------------------------|--------------------------------------|----------------------------------------|--------------------------------------------|
| <b><math>\Delta lprG</math> recombineering substrate</b> | pJSC407- $\Delta lprG$ | 5' flank inserted using <u>HindIII</u>     | tgatccacgaaagcttggatggtcagacggcg     | ggccaccatgaagcttctaggtggcaaggatggcgaac | <i>Msm mc</i> <sup>2</sup> 155 genomic DNA |
|                                                          |                        | 3' flank inserted using <u>XbaI</u>        | cggacaggactctagagactgggtaagcaggtcaac | ccgggatcctctagaggttatcgcatgccgacg      | <i>Msm mc</i> <sup>2</sup> 155 genomic DNA |
| <b><i>lprG</i> complement plasmid</b>                    | pMV306- <i>lprG</i>    | inserted using <u>XbaI</u> and <u>ClaI</u> | gatctttaaactctagaccagccggtcgcagatc   | actacgtcgacatcgattcaggccgcgggc         | <i>Msm mc</i> <sup>2</sup> 155 genomic DNA |
